# Supplementary material
Source: PubMed Central journal article supplement (PMC3282404)
Supplement: hdy201182x1.pdf [file hdy201182x1.pdf]

**Supplementary Table 1.** Sex Ratio and Male Infection Frequency of PI-*Wolbachia* infected *Asobara japonica* for each female per strain and rearing temperature.

| Female ID | Strain   | Temp | ClutchSize | Daughters | Sons | SexRatio | Inf Sons | Uninf Sons | InfectionFreq |
|-----------|----------|------|------------|-----------|------|----------|----------|------------|---------------|
| sap20.1   | Sapporo  | 20   | 121        | 121       | 0    | 0.00     | 0        | 0          | -             |
| sap20.2   | Sapporo  | 20   | 108        | 107       | 1    | 0.01     | 1        | 0          | 1.00          |
| sap20.3   | Sapporo  | 20   | 26         | 26        | 0    | 0.00     | 0        | 0          | -             |
| sap20.4   | Sapporo  | 20   | 103        | 103       | 0    | 0.00     | 0        | 0          | -             |
| sap20.5   | Sapporo  | 20   | 123        | 120       | 3    | 0.02     | 3        | 0          | 1.00          |
| sap20.6   | Sapporo  | 20   | 85         | 85        | 0    | 0.00     | 0        | 0          | -             |
| sap20.7   | Sapporo  | 20   | 114        | 114       | 0    | 0.00     | 0        | 0          | -             |
| sap20.8   | Sapporo  | 20   | 109        | 108       | 1    | 0.01     | 1        | 0          | 1.00          |
| sap20.9   | Sapporo  | 20   | 82         | 82        | 0    | 0.00     | 0        | 0          | -             |
| sap20.10  | Sapporo  | 20   | 119        | 117       | 2    | 0.02     | 2        | 0          | 1.00          |
| sap25.1   | Sapporo  | 25   | 131        | 130       | 1    | 0.01     | 1        | 0          | 1.00          |
| sap25.2   | Sapporo  | 25   | 98         | 98        | 0    | 0.00     | 0        | 0          | -             |
| sap25.3   | Sapporo  | 25   | 121        | 121       | 0    | 0.00     | 0        | 0          | -             |
| sap25.4   | Sapporo  | 25   | 123        | 121       | 2    | 0.02     | 2        | 0          | 1.00          |
| sap25.5   | Sapporo  | 25   | 122        | 119       | 3    | 0.02     | 2        | 1          | 0.67          |
| sap25.6   | Sapporo  | 25   | 125        | 125       | 0    | 0.00     | 0        | 0          | -             |
| sap25.7   | Sapporo  | 25   | 121        | 52        | 69   | 0.57     | 8        | 61         | 0.12          |
| sap25.8   | Sapporo  | 25   | 102        | 101       | 1    | 0.01     | 1        | 0          | 1.00          |
| sap25.9   | Sapporo  | 25   | 97         | 97        | 0    | 0.00     | 0        | 0          | -             |
| sap25.10  | Sapporo  | 25   | 97         | 93        | 4    | 0.04     | 4        | 0          | 1.00          |
| hir20.1   | Hirosaki | 20   | 5          | 5         | 0    | 0.00     | 0        | 0          | -             |
| hir20.2   | Hirosaki | 20   | 62         | 62        | 0    | 0.00     | 0        | 0          | -             |
| hir20.3   | Hirosaki | 20   | 88         | 87        | 1    | 0.01     | 1        | 0          | 1.00          |
| hir20.4   | Hirosaki | 20   | 72         | 72        | 0    | 0.00     | 0        | 0          | -             |
| hir20.5   | Hirosaki | 20   | 63         | 63        | 0    | 0.00     | 0        | 0          | -             |
| hir20.6   | Hirosaki | 20   | 91         | 91        | 0    | 0.00     | 0        | 0          | -             |
| hir20.7   | Hirosaki | 20   | 103        | 102       | 1    | 0.01     | 1        | 0          | 1.00          |
| hir20.8   | Hirosaki | 20   | 71         | 71        | 0    | 0.00     | 0        | 0          | -             |
| hir20.9   | Hirosaki | 20   | 86         | 86        | 0    | 0.00     | 0        | 0          | -             |
| hir20.10  | Hirosaki | 20   | 42         | 41        | 1    | 0.02     | 1        | 0          | 1.00          |
| hir25.1   | Hirosaki | 25   | 66         | 62        | 4    | 0.06     | 3        | 1          | 0.75          |
| hir25.2   | Hirosaki | 25   | 74         | 74        | 0    | 0.00     | 0        | 0          | -             |
| hir25.3   | Hirosaki | 25   | 120        | 120       | 0    | 0.00     | 0        | 0          | -             |
| hir25.4   | Hirosaki | 25   | 90         | 87        | 3    | 0.03     | 3        | 0          | 1.00          |
| hir25.5   | Hirosaki | 25   | 93         | 93        | 0    | 0.00     | 0        | 0          | -             |
| hir25.6   | Hirosaki | 25   | 99         | 98        | 1    | 0.01     | 1        | 0          | 1.00          |
| hir25.7   | Hirosaki | 25   | 59         | 59        | 0    | 0.00     | 0        | 0          | -             |
| hir25.8   | Hirosaki | 25   | 116        | 112       | 4    | 0.03     | 4        | 0          | 1.00          |
| hir25.9   | Hirosaki | 25   | 89         | 89        | 0    | 0.00     | 0        | 0          | -             |
| hir25.10  | Hirosaki | 25   | 119        | 118       | 1    | 0.01     | 1        | 0          | 1.00          |
| sen20.1   | Sendai   | 20   | 95         | 95        | 0    | 0.00     | 0        | 0          | -             |
| sen20.2   | Sendai   | 20   | 108        | 108       | 0    | 0.00     | 0        | 0          | -             |
| sen20.3   | Sendai   | 20   | 101        | 101       | 0    | 0.00     | 0        | 0          | -             |
| sen20.4   | Sendai   | 20   | 101        | 101       | 0    | 0.00     | 0        | 0          | -             |
| sen20.5   | Sendai   | 20   | 99         | 99        | 0    | 0.00     | 0        | 0          | -             |
| sen20.6   | Sendai   | 20   | 80         | 80        | 0    | 0.00     | 0        | 0          | -             |
| sen20.7   | Sendai   | 20   | 78         | 78        | 0    | 0.00     | 0        | 0          | -             |
| sen20.8   | Sendai   | 20   | 109        | 109       | 0    | 0.00     | 0        | 0          | -             |
| sen20.9   | Sendai   | 20   | 105        | 105       | 0    | 0.00     | 0        | 0          | -             |
| sen20.10  | Sendai   | 20   | 106        | 106       | 0    | 0.00     | 0        | 0          | -             |

**Supplementary Table 1.** continued

| Female ID | Strain    | Temp | ClutchSize | Daughters | Sons | SexRatio | Inf Sons | Uninf Sons | InfectionFreq |
|-----------|-----------|------|------------|-----------|------|----------|----------|------------|---------------|
| sen25.1   | Sendai    | 25   | 104        | 104       | 0    | 0.00     | 0        | 0          | -             |
| sen25.2   | Sendai    | 25   | 84         | 84        | 0    | 0.00     | 0        | 0          | -             |
| sen25.3   | Sendai    | 25   | 90         | 90        | 0    | 0.00     | 0        | 0          | -             |
| sen25.4   | Sendai    | 25   | 102        | 102       | 0    | 0.00     | 0        | 0          | -             |
| sen25.5   | Sendai    | 25   | 129        | 129       | 0    | 0.00     | 0        | 0          | -             |
| sen25.6   | Sendai    | 25   | 100        | 100       | 0    | 0.00     | 0        | 0          | -             |
| sen25.7   | Sendai    | 25   | 100        | 99        | 1    | 0.01     | 1        | 0          | 1.00          |
| sen25.8   | Sendai    | 25   | 106        | 105       | 1    | 0.01     | 1        | 0          | 1.00          |
| sen25.9   | Sendai    | 25   | 114        | 114       | 0    | 0.00     | 0        | 0          | -             |
| sen25.10  | Sendai    | 25   | 106        | 105       | 1    | 0.01     | 1        | 0          | 1.00          |
| tok20.1   | Tokyo     | 20   | 119        | 118       | 1    | 0.01     | 0        | 1          | 0.00          |
| tok20.2   | Tokyo     | 20   | 90         | 89        | 1    | 0.01     | 0        | 1          | 0.00          |
| tok20.3   | Tokyo     | 20   | 104        | 104       | 0    | 0.00     | 0        | 0          | -             |
| tok20.4   | Tokyo     | 20   | 112        | 112       | 0    | 0.00     | 0        | 0          | -             |
| tok20.5   | Tokyo     | 20   | 82         | 82        | 0    | 0.00     | 0        | 0          | -             |
| tok20.6   | Tokyo     | 20   | 45         | 18        | 27   | 0.60     | 17       | 10         | 0.63          |
| tok20.7   | Tokyo     | 20   | 102        | 102       | 0    | 0.00     | 0        | 0          | -             |
| tok20.8   | Tokyo     | 20   | 107        | 107       | 0    | 0.00     | 0        | 0          | -             |
| tok20.9   | Tokyo     | 20   | 94         | 92        | 2    | 0.02     | 2        | 0          | 1.00          |
| tok20.10  | Tokyo     | 20   | 91         | 90        | 1    | 0.01     | 1        | 0          | 1.00          |
| tok25.1   | Tokyo     | 25   | 104        | 103       | 1    | 0.01     | 1        | 0          | 1.00          |
| tok25.2   | Tokyo     | 25   | 118        | 105       | 13   | 0.11     | 12       | 1          | 0.92          |
| tok25.3   | Tokyo     | 25   | 94         | 94        | 0    | 0.00     | 0        | 0          | -             |
| tok25.4   | Tokyo     | 25   | 122        | 122       | 0    | 0.00     | 0        | 0          | -             |
| tok25.5   | Tokyo     | 25   | 95         | 95        | 0    | 0.00     | 0        | 0          | -             |
| tok25.6   | Tokyo     | 25   | 104        | 104       | 0    | 0.00     | 0        | 0          | -             |
| tok25.7   | Tokyo     | 25   | 119        | 119       | 0    | 0.00     | 0        | 0          | -             |
| tok25.8   | Tokyo     | 25   | 56         | 56        | 0    | 0.00     | 0        | 0          | -             |
| tok25.9   | Tokyo     | 25   | 107        | 107       | 0    | 0.00     | 0        | 0          | -             |
| tok25.10  | Tokyo     | 25   | 105        | 105       | 0    | 0.00     | 0        | 0          | -             |
| kag20.1   | Kagoshima | 20   | 106        | 106       | 0    | 0.00     | 0        | 0          | -             |
| kag20.2   | Kagoshima | 20   | 74         | 74        | 0    | 0.00     | 0        | 0          | -             |
| kag20.3   | Kagoshima | 20   | 89         | 89        | 0    | 0.00     | 0        | 0          | -             |
| kag20.4   | Kagoshima | 20   | 92         | 92        | 0    | 0.00     | 0        | 0          | -             |
| kag20.5   | Kagoshima | 20   | 127        | 126       | 1    | 0.01     | 1        | 0          | 1.00          |
| kag20.6   | Kagoshima | 20   | 100        | 100       | 0    | 0.00     | 0        | 0          | -             |
| kag20.7   | Kagoshima | 20   | 117        | 117       | 0    | 0.00     | 0        | 0          | -             |
| kag20.8   | Kagoshima | 20   | 81         | 81        | 0    | 0.00     | 0        | 0          | -             |
| kag20.9   | Kagoshima | 20   | 118        | 118       | 0    | 0.00     | 0        | 0          | -             |
| kag20.10  | Kagoshima | 20   | 54         | 53        | 1    | 0.02     | 1        | 0          | 1.00          |
| kag25.1   | Kagoshima | 25   | 97         | 97        | 0    | 0.00     | 0        | 0          | -             |
| kag25.2   | Kagoshima | 25   | 120        | 120       | 0    | 0.00     | 0        | 0          | -             |
| kag25.3   | Kagoshima | 25   | 118        | 118       | 0    | 0.00     | 0        | 0          | -             |
| kag25.4   | Kagoshima | 25   | 133        | 119       | 14   | 0.11     | 14       | 0          | 1.00          |
| kag25.5   | Kagoshima | 25   | 117        | 117       | 0    | 0.00     | 0        | 0          | -             |
| kag25.6   | Kagoshima | 25   | 98         | 98        | 0    | 0.00     | 0        | 0          | -             |
| kag25.7   | Kagoshima | 25   | 85         | 85        | 0    | 0.00     | 0        | 0          | -             |
| kag25.8   | Kagoshima | 25   | 120        | 114       | 6    | 0.05     | 5        | 1          | 0.83          |
| kag25.9   | Kagoshima | 25   | 112        | 112       | 0    | 0.00     | 0        | 0          | -             |
| kag25.10  | Kagoshima | 25   | 100        | 97        | 3    | 0.03     | 3        | 0          | 1.00          |
